# Supplementary material
Source: Springer Nature journal article supplement (https://www.springermedizin.de/resource/supplementary/12891_2014_2356_MOESM2_ESM.pdf/9510072)

**a**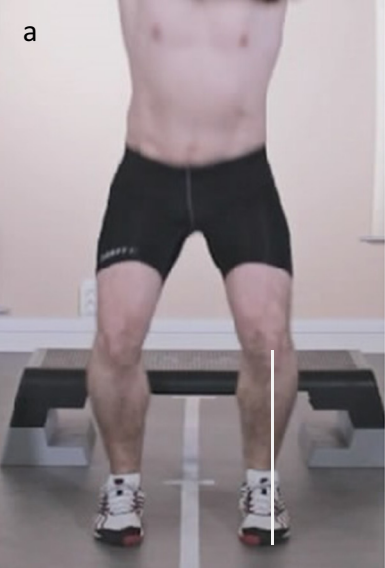**b**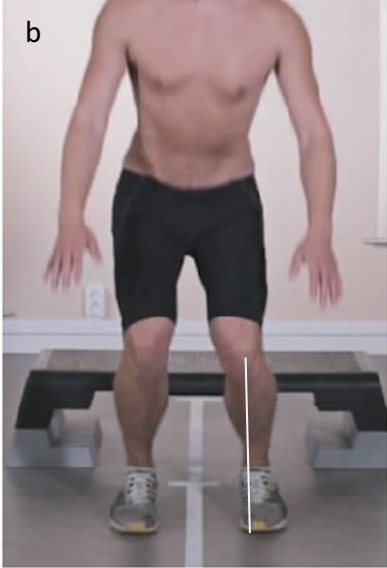**c**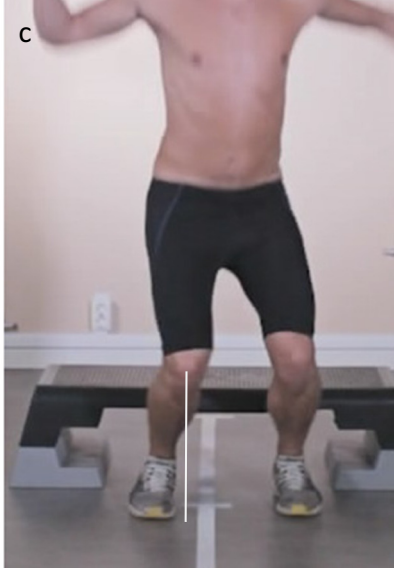

Supplement: MOESM2 [file 9510072]
